# Supplementary material for: ZFP30 promotes adipogenesis through the KAP1-mediated activation of a retrotransposon-derived Pparg2 enhancer
Source: PubMed Central journal article supplement (PMC6472429; doi:10.1038/s41467-019-09803-9), 2019-04-18
Supplement: 41467_2019_9803_MOESM3_ESM.pdf [file 41467_2019_9803_MOESM3_ESM.pdf]

## Description of Additional Supplementary Files

### Supplementary Data 1

**Description:** Genes significantly up- and downregulated upon *Zfp30* KD (3T3-L1) and KO (IBA), respectively

### Supplementary Data 2

**Description:** Gene Ontology biological processes enriched in genes responding to adipogenesis or alterations of *Zfp30* levels

### Supplementary Data 3

**Description:** Correlation between ChIP-seq read counts at ZFP30- and KAP1-bound regions

### Supplementary Data 4

**Description:** Differential ChIP-seq enrichment for ZFP30-HA and KAP1 peaks across adipogenic differentiation

### Supplementary Data 5

**Description:** Known TF binding sites that are significantly enriched in ZFP30-bound regions

### Supplementary Data 6

**Description:** L1ME repetitive elements overlapping ZFP30-HA ChIP-seq peaks

### Supplementary Data 7

**Description:** List of the adipogenic transcription factors used for the motif scanning of the Pparg2\_M1 deleted DNA fragment.
